# Supplementary material for: High-Resolution RNA Maps Suggest Common Principles of Splicing and Polyadenylation Regulation by TDP-43
Source: PubMed Central journal article supplement — Cell Rep. 2017 May 2;19(5):1056–67. doi: 10.1016/j.celrep.2017.04.028 (PMC5437728; doi:10.1016/j.celrep.2017.04.028), 2017-05-02
Supplement: mmc6.pdf [file mmc6.pdf]

| Sample name |                | % duplicated |               | % GC       |               | Reads [M]  |               | % mapped   |               | % internal priming |               |
|-------------|----------------|--------------|---------------|------------|---------------|------------|---------------|------------|---------------|--------------------|---------------|
| Rot et al.  | Gruber et al.  | Rot et al.   | Gruber et al. | Rot et al. | Gruber et al. | Rot et al. | Gruber et al. | Rot et al. | Gruber et al. | Rot et al.         | Gruber et al. |
| HEK WT 1    | HEK no siRNA   | 44           | 74            | 37         | 36            | 6.5        | 55.3          | 54         | 52            | 31                 | 25            |
| HEK WT 2    | HEK siRNA ctrl | 42           | 72            | 37         | 37            | 3.2        | 30.4          | 56         | 53            | 32                 | 26            |
| HEK WT 3    | HEK IM25       | 41           | 70            | 38         | 35            | 3.4        | 34.7          | 52         | 53            | 31                 | 28            |
| HEK WT 4    | HEK IM59       | 35           | 75            | 41         | 36            | 2.9        | 43.9          | 54         | 52            | 32                 | 27            |
| HEK WT 5    | HEK IM68 1     | 41           | 75            | 39         | 33            | 6          | 27.4          | 56         | 64            | 32                 | 34            |
| HEK WT 6    | HEK IM68 2     | 40           | 80            | 40         | 33            | 4.4        | 72.5          | 53         | 64.67         | 31                 | 31            |
| TDP-43 KD 1 |                | 37           |               | 41         |               | 2.9        |               | 56         |               | 32                 |               |
| TDP-43 KD 2 |                | 44           |               | 39         |               | 6          |               | 53         |               | 35                 |               |
| TDP-43 KD 3 |                | 43           |               | 40         |               | 4.3        |               | 55         |               | 32                 |               |
| TDP-43 KD 4 |                | 40           |               | 37         |               | 6.6        |               | 56         |               | 32                 |               |
| TDP-43 KD 5 |                | 38           |               | 37         |               | 3.2        |               | 54         |               | 35                 |               |
| TDP-43 KD 6 |                | 38           |               | 38         |               | 3.5        |               | 55         |               | 32                 |               |
